# Supplementary material for: MicroRNA-Mediated Regulation of the Virus Cycle and Pathogenesis in the SARS-CoV-2 Disease
Source: MDPI journal article supplement (doi:10.3390/ijms222413192), 2021-12-07
Supplement: s1 [file s1]

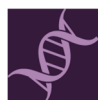

Article

# MicroRNA-mediated regulation of the virus cycle and pathogenesis in the SARS-CoV-2 disease

Rosalia Battaglia, Ruben Alonzo, Chiara Pennisi, Angela Caponnetto, Carmen Ferrara, Michele Stella, Cristina Barbagallo, Davide Barbagallo, Marco Ragusa, Michele Purrello and Cinzia Di Pietro \*

**Supplementary Table S1.** Validated target genes, from KEGG analysis, of six V-miRNAs: miR-411-5p, miR-548au-3p, miR-548q, miR-744-3p, miR-5680 and miR-6853-3p. Predicted targets and scores by microT-CDS for miR-6853-3p are shown.

| miR-411-5p      | miR-548au-3p    | miR-744-3p | miR-6853-3p | Score | miR-6853-3p | Score |
|-----------------|-----------------|------------|-------------|-------|-------------|-------|
| BIRC3           | ATP2A3          | AIFM1      | ADH1B       | 0.928 | KCNMA1      | 0.970 |
| CCND1           | DHCR24          | BAG4       | AMOT        | 0.817 | LATS1       | 0.801 |
| CEBPB           | FMO5            | CASP3      | APAF1       | 0.954 | MAP2K4      | 0.893 |
| COL4A2          | GNAI2           | CDKN1B     | ATP1B1      | 0.991 | MAPK14      | 0.849 |
| FGF2            | HSPG2           | CHD4       | ATP1B3      | 0.872 | MECOM       | 0.865 |
| FN1             | MSH3            | CREB3      | ATP2A2      | 0.942 | MED1        | 0.800 |
| FST             | MYC             | CRK        | ATP2B1      | 0.989 | MEF2A       | 0.853 |
| HSP90AB1        | NCOR1           | DAG1       | ATP2B3      | 0.816 | NCOA2       | 0.837 |
| NCOA1           | NOTCH2          | DDX5       | ATP6V0D1    | 0.925 | NOG         | 0.989 |
| PDGFRA          | ROCK2           | INHBB      | BMPR2       | 0.808 | NOS3        | 0.861 |
| PIK3CB          | THBS1           | JUNB       | CCR8        | 0.886 | PDGFD       | 0.840 |
| SMURF2          | YWHAZ           | MDM2       | CDK6        | 0.802 | PIK3CB      | 0.919 |
| THBS2           |                 | MED14      | CREB3L1     | 0.847 | PIK3R2      | 0.881 |
|                 |                 | MEF2D      | CSF2RB      | 0.872 | PLCZ1       | 0.876 |
|                 |                 | MSH6       | CTBP2       | 0.807 | PPP2CA      | 0.997 |
|                 |                 | MSMO1      | CTGF        | 0.975 | PPP3CA      | 0.891 |
| <b>miR-548q</b> | <b>miR-5680</b> | NCOA2      | CTNNA1      | 0.956 | PRKAR2A     | 0.839 |
| IGF1R           | CDK6            | NCOA3      | CX3CL1      | 0.806 | RBPJ        | 0.988 |
| NFKBIA          | GTF2A1          | PGAM5      | CXCL5       | 0.824 | RPS6KB1     | 0.997 |
| SP1             | MDM2            | PPP1R12A   | CYP3A4      | 0.913 | SLC16A10    | 0.874 |
| UBE3A           | RHOA            | PPP2CA     | DFFA        | 0.826 | SMAD2       | 0.946 |
|                 |                 | PPP3CB     | DNM1L       | 0.908 | SMAD7       | 0.995 |
|                 |                 | RAF1       | EP300       | 0.946 | SMURF2      | 0.812 |
|                 |                 | SKP1       | FZD3        | 0.898 | TBC1D4      | 0.915 |
|                 |                 | SMURF2     | GUCY1A2     | 0.831 | THBS3       | 0.879 |
|                 |                 | YAP1       | ID4         | 0.836 | TLR4        | 0.958 |
|                 |                 |            | IRAK3       | 0.943 | UBE3A       | 0.950 |
|                 |                 |            | IRS1        | 0.880 | USP7        | 0.985 |
|                 |                 |            | ITGAV       | 0.833 | WNT9B       | 0.809 |

---

|       |       |      |       |
|-------|-------|------|-------|
| ITGB1 | 0.900 | YAP1 | 0.960 |
| ITGB8 | 0.820 |      |       |

---

**Supplementary Table S2.** Table showing seed match and MFE between hsa-miRNA and Viral Genome with best LogitProbability score. The miRNAs are ordered by MFE score.

| hsa-miRNAs    | $\Delta G^\circ$ | LogitProb | hsa-miRNAs    | $\Delta G^\circ$ | LogitProb |
|---------------|------------------|-----------|---------------|------------------|-----------|
| miR-7108-5p   | -29.5            | 0.908     | miR-15a-5p    | -20.1            | 0.904     |
| miR-15b-5p    | -28.9            | 0.93      | miR-152-3p    | -19.6            | 0.759     |
| miR-6124      | -26.5            | 0.888     | miR-6728-3p   | -19.3            | 0.902     |
| miR-4684-3p   | -25.8            | 0.894     | miR-4709-5p   | -19.1            | 0.848     |
| miR-298       | -24.8            | 0.888     | miR-892c-3p   | -18.8            | 0.855     |
| miR-7851-3p   | -24.7            | 0.519     | miR-148b-3p   | -18.7            | 0.808     |
| miR-1226-3p   | -24              | 0.888     | miR-589-5p    | -18.7            | 0.945     |
| miR-1293      | -23.8            | 0.879     | miR-122b-3p   | -18.4            | 0.86      |
| miR-5192      | -23.7            | 0.852     | miR-580-3p    | -18              | 0.947     |
| miR-6811-3p   | -23.4            | 0.89      | miR-148a-3p   | -17.8            | 0.864     |
| miR-16-5p     | -23.4            | 0.942     | miR-548as-3p  | -17.6            | 0.906     |
| miR-4502      | -23.1            | 0.881     | miR-548m      | -17.5            | 0.92      |
| miR-203a-5p   | -22.7            | 0.883     | miR-4742-3p   | -17.4            | 0.845     |
| miR-219b-3p   | -22.5            | 0.779     | miR-675-3p    | -16.9            | 0.851     |
| miR-644a      | -21.8            | 0.939     | miR-1297      | -16.8            | 0.84      |
| miR-195-5p    | -21.7            | 0.941     | miR-6835-3p   | -16.3            | 0.821     |
| miR-21-3p     | -21.6            | 0.86      | miR-3164      | -16.1            | 0.781     |
| miR-4288      | -21.5            | 0.945     | miR-452-5p    | -15.9            | 0.89      |
| miR-5682      | -21.5            | 0.801     | miR-196a-1-3p | -15.6            | 0.954     |
| miR-510-3p    | -20.9            | 0.921     | miR-4676-3p   | -14.9            | 0.887     |
| miR-624-5p    | -20.7            | 0.875     | miR-6820-3p   | -13.4            | 0.783     |
| miR-219a-1-3p | -20.5            | 0.886     | miR-577       | -12.2            | 0.906     |
| miR-4483      | -20.3            | 0.892     | miR-511-3p    | -11.7            | 0.809     |
| miR-4490      | -20.2            | 0.941     |               |                  |           |

**Supplementary Table S3.** hsa-miRNAs targeting Wuhan SARS-CoV-2 genome regions and VOCs. miRDB scores are shown in brackets.

| 5'UTR              |                    |                    |                    |                    |                    |
|--------------------|--------------------|--------------------|--------------------|--------------------|--------------------|
| Wuhan              | Alpha              | Beta               | Gamma              | Delta              | Omicron            |
| miR-298 (91)       | miR-298 (92)       | miR-298 (96)       | miR-298 (92)       | miR-298 (92)       | miR-298 (92)       |
| miR-7851-3p (91)   | nd                 | nd                 | nd                 | nd                 | nd                 |
| NSP13              |                    |                    |                    |                    |                    |
| Wuhan              | Alpha              | Beta               | Gamma              | Delta              | Omicron            |
| miR-1226-3p (90)   |
| miR-1293 (87)      |
| miR-219b-3p (88)   |
| miR-4483 (86)      |
| miR-452-5p (86)    |
| miR-4676-3p (86)   |
| miR-4709-5p (87)   |
| miR-7108-5p (96)   |
| miR-892c-3p (86)   |
| NSP14              |                    |                    |                    |                    |                    |
| Wuhan              | Alpha              | Beta               | Gamma              | Delta              | Omicron            |
| miR-4742-3p (94)   |
| miR-548as-3p (94)  |
| miR-644a (92)      |
| miR-548m (88)      |
| miR-6811-3p (86)   |
| miR-4288 (85)      |
| NSP15              |                    |                    |                    |                    |                    |
| Wuhan              | Alpha              | Beta               | Gamma              | Delta              | Omicron            |
| miR-122b-3p (94)   |
| miR-1297 (85)      |
| miR-21-3p (94)     |
| SPIKE              |                    |                    |                    |                    |                    |
| Wuhan              | Alpha              | Beta               | Gamma              | Delta              | Omicron            |
| miR-122b-3p (71)   | miR-122b-3p (80)   | miR-122b-3p (87)   | miR-122b-3p (87)   | miR-122b-3p (80)   | miR-122b-3p (79)   |
| miR-15a-5p (87)    | miR-15a-5p (87)    | miR-15a-5p (87)    | miR-15a-5p (91)    | miR-15a-5p (87)    | miR-15a-5p (87)    |
| miR-15b-5p (87)    | miR-15b-5p (87)    | miR-15b-5p (87)    | miR-15b-5p (91)    | miR-15b-5p (87)    | miR-15b-5p (87)    |
| miR-16-5p (87)     | miR-16-5p (87)     | miR-16-5p (87)     | miR-16-5p (91)     | miR-16-5p (87)     | miR-16-5p (87)     |
| miR-182-3p (57)    | miR-182-3p (57)    | miR-182-3p (57)    | miR-182-3p (57)    | miR-182-3p (90)    | miR-182-3p (57)    |
| miR-195-5p (87)    | miR-195-5p (87)    | miR-195-5p (87)    | miR-195-5p (91)    | miR-195-5p (87)    | miR-195-5p (87)    |
| miR-196a-1-3p (86) |

|                    |                    |                    |                    |                    |                    |
|--------------------|--------------------|--------------------|--------------------|--------------------|--------------------|
| miR-203a-5p (87)   |
| miR-21-3p (71)     | miR-21-3p (80)     | miR-21-3p (87)     | miR-21-3p (87)     | miR-21-3p (80)     | miR-21-3p (79)     |
| miR-219a-1-3p (85) |
| miR-424-5p (84)    | miR-424-5p (84)    | miR-424-5p (84)    | miR-424-5p (89)    | miR-424-5p (84)    | miR-424-5p (84)    |
| miR-4490 (87)      |
| miR-497-5p (84)    | miR-497-5p (84)    | miR-497-5p (84)    | miR-497-5p (89)    | miR-497-5p (84)    | miR-497-5p (84)    |
| miR-510-3p (92)    |
| miR-511-3p (89)    |
| miR-597-3p (81)    | miR-597-3p (81)    | miR-597-3p (81)    | miR-597-3p (81)    | miR-597-3p (88)    | miR-597-3p (81)    |
| miR-6124 (89)      | miR-6124 (87)      |
| miR-624-5p (90)    | miR-624-5p (90)    | miR-624-5p (90)    | miR-624-5p (90)    | miR-624-5p (91)    | miR-624-5p (90)    |
| miR-6838-5p (84)   | miR-6835-5p (68)   | miR-6835-5p (68)   | miR-6838-5p (89)   | miR-6838-3p (51)   | miR-6835-5p (68)   |
| ORF6a              |                    |                    |                    |                    |                    |
| Wuhan              | Alpha              | Beta               | Gamma              | Delta              | Omicron            |
| miR-3164 (86)      |
| miR-577 (89)       |
| miR-580-3p (94)    |
| miR-6728-3p (96)   |
| miR-6820-3p (86)   |
| ORF7a              |                    |                    |                    |                    |                    |
| Wuhan              | Alpha              | Beta               | Gamma              | Delta              | Omicron            |
| miR-148a-3p (94)   |
| miR-148b-3p (94)   |
| miR-152-3p (94)    |
| miR-4502 (88)      |
| miR-5192 (88)      |
| ORF7b              |                    |                    |                    |                    |                    |
| Wuhan              | Alpha              | Beta               | Gamma              | Delta              | Omicron            |
| miR-589-5p (94)    |
| miR-6835-3p (91)   |
| Nucleocapsid       |                    |                    |                    |                    |                    |
| Wuhan              | Alpha              | Beta               | Gamma              | Delta              | Omicron            |
| miR-4684-3p (86)   |
| miR-5682 (92)      |
| miR-615-5p (79)    | miR-615-5p (89)    | miR-615-5p (79)    | miR-615-5p (79)    | miR-615-5p (79)    | miR-615-5p (80)    |
| miR-675-3p (87)    |
| 3'UTR              |                    |                    |                    |                    |                    |
| Wuhan              | Alpha              | Beta               | Gamma              | Delta              | Omicron            |
| miR-3941 (84)      | miR-3941 (85)      | miR-3941 (85)      | miR-3941 (85)      | miR-3941 (85)      | miR-3941 (80)      |
